# Supplementary material for: Older high-cost patients in Norwegian somatic hospitals: a register-based study of patient characteristics
Source: HighWire-hosted journal article supplement (doi:10.1136/bmjopen-2023-074411), 2023-10-01
Supplement: bmjopen-2023-074411supp001_data_supplement.pdf [file bmjopen-2023-074411supp001_data_supplement.pdf]

## Appendix 1

| <b>Information about the variable(s)</b>                                                                                  |
|---------------------------------------------------------------------------------------------------------------------------|
| The number of times this main diagnosis group in the DRG-system was registered with each patient in 2019.                 |
| HDG: Main Diagnosis Group (MDG)                                                                                           |
|                                                                                                                           |
| <b>NPR - HDG – Diseases of the nervous system</b>                                                                         |
| <b>NPR - HDG – Diseases in breast tissue</b>                                                                              |
| <b>NPR - HDG – Diseases of the eye</b>                                                                                    |
| <b>NPR - HDG – Diseases of the female genitalia</b>                                                                       |
| <b>NPR - HDG – Ear, nose, and throat disorders</b>                                                                        |
| <b>NPR - HDG – Diseases of the respiratory organs</b>                                                                     |
| <b>NPR - HDG – Diseases of the circulatory organs</b>                                                                     |
| <b>NPR - HDG – Diseases of the blood, blood-forming organs, and immune system</b>                                         |
| <b>NPR - HDG – Diseases of the digestive organs</b>                                                                       |
| <b>NPR - HDG – Myeloproliferative disorders and differentiated tumors</b>                                                 |
| <b>NPR - HDG – Categories across multiple main diagnostic groups</b>                                                      |
| <b>NPR - HDG – Infectious and parasitic diseases</b>                                                                      |
| <b>NPR - HDG – Burns and burn related wounds</b>                                                                          |
| <b>NPR - HDG - Categories for Error and Uncommon Diagnosis Procedure Combinations</b>                                     |
| <b>NPR - HDG – Diseases of the liver, biliary tract, and pancreas</b>                                                     |
| <b>NPR - HDG – Mental disorders and substance abuse problems</b>                                                          |
| <b>NPR - HDG – Diseases of the musculoskeletal system and connective tissue</b>                                           |
| <b>NPR - HDG – Trauma, poisoning and toxic effects of drugs/other substances, drug abuse and organic mental disorders</b> |

|                                                                             |
|-----------------------------------------------------------------------------|
| <b>NPR - HDG – Diseases of the skin and subcutaneous tissue</b>             |
| <b>NPR - HDG – Internal secretory, nutritional, and metabolic disorders</b> |
| <b>NPR - HDG – Kidney and urinary tract disorders</b>                       |
| <b>NPR - HDG – Diseases of the male genitalia</b>                           |
